# Supplementary material for: Reactive species formed from N-benzyloxycarbonyl Î±-aminophosphonochloridates and triethylamine: probable identity and implications for synthesisElectronic supplementary information (ESI) available: NMR data for compounds 4 and 5 (X = Cl) and the products formed by them with Et3N. See http://www.rsc.org/suppdata/cc/b1/b109231f/
Source: Royal Society of Chemistry journal article supplement (doi:10.1039/b109231f), 2002-02-13
Supplement: b109231f.doc [file b109231f.doc]

# Supplementary data

NMR data for compounds **4** and **5** (X = Cl) and the products formed by them with Et3N.

**4** (X = Cl): H (300 MHz, CDCl3) 7.34 (5 H), 5.72 (1 H, br t, *J*HH ~ 6, NH), 5.13 (2 H, s), 3.96 (2 H, dd, *J*PH ~ *J*HH ~ 6, NHC*H*2P) and 3.86 (3 H, d, *J*PH 13, OMe); C(CDCl3) 156.4 (*J*PC 4), 136.3, 129.0, 128.8, 128.6, 68.0, 54.0 (*J*PC 8.5, OMe) and 43.4 (*J*PC 142, C); Product **A** formed with Et3N: H (300 MHz, CDCl3) 7.38 (5 H), 5.25 (2 H, s), 3.92 (3 H, d, *J*PH 11.5, OMe) and 3.75 (2 H, d, *J*PH 8, NC*H*2P; slight non-equivalence of diastereotopic H atoms); C(CDCl3) 155.1 (*J*PC 42), 134.3, 128.8, 128.6, 128.3, 71.1, 54.1 (*J*PC 7, OMe) and 46.6 (*J*PC 104, C) (also signals for Et3N/Et3NHCl).

**5** (X = Cl): H (300 MHz, CDCl3) 7.47.25 (5 H), 5.39 (1 H, s, NH), 5.06 (2 H, s), 3.85 (3 H, d, *J*PH 12.5, OMe) and 1.69 (6 H, d, *J*PH 19, Me2CP); C(CDCl3) 154.7 (*J*PC 6), 136.6, 128.9, 128.6 ( 1 signal), 67.1, 57.6 (*J*PC 134, C), 54.2 (*J*PC 10, OMe) and 23.4; Product **B** formed with Et3N: H (300 MHz, CDCl3) 7.47.25 (5 H), 5.20 (2 H, s), 3.91 (3 H, d, *J*PH 11, OMe), 1.49 (3 H, d, *J*PH 17, MeCP) and 1.45 (3 H, d, *J*PH 17, MeCP); C(CDCl3) 152.9 (*J*PC 36), 134.6, 128.9, 128.8, 128.5, 71.0 (*J*PC 2), 59.3 (*J*PC 107, C), 54.4 (*J*PC 8, OMe), 25.2 (d, *J*PC 5) and 24.5 (also signals for Et3N/Et3NHCl).
